# Supplementary material for: Operando X-ray absorption spectroscopic studies of the carbon dioxide reduction reaction in a modified flow cell
Source: Royal Society of Chemistry journal article supplement (doi:10.1039/d2cy00220e), 2022-01-01
Supplement: d2cy00220e1.pdf [file d2cy00220e1.pdf]

# Supporting Information

## Operando X-ray Absorption Spectroscopic Studies of Carbon

### Dioxide Reduction Reaction in a Modified Flow Cell

*Sung-Fu Hung,\* Feng-Yi Wu, Yi-Hsuan Lu, Tsung-Ju Lee, Hsin-Jung Tsai, Pei-Hsuan Chen,  
Zih-Yi Lin, Guan-Lin Chen, Wen-Yang Huang, Wen-Jing Zeng*

*Department of Applied Chemistry, National Yang Ming Chiao Tung University, Hsinchu 300, Taiwan.*

Email: [sungfuhung@nycu.edu.tw](mailto:sungfuhung@nycu.edu.tw)

**This file includes:**

Experimental Section

Supplementary Figures 1 to 23

## Experimental Section

*Preparation of a sputtered Cu on PTFE substrate:* Cu with a thickness of 300 nm was sputtered on a PTFE substrate (pore size of 450 nm) using a pure Cu target (99.99%) with an Ar flow rate of 3 mtorr at a DC power of 30 Watts in a magnetron sputtering system. The base pressure is below  $5 \times 10^{-6}$  torr, acquired using a turbomolecular pump.

*Synthesis of a sprayed Cu(OH)<sub>2</sub> on PTFE substrate:* 15 mmol of Cu(NO<sub>3</sub>)<sub>2</sub> was dissolved into 30.0 ml of deionized (DI) water. 30 ml of 1.0 M KOH was added dropwise under vigorous stirring. The precipitates were centrifuged with water three times and methanol one time and dried under vacuum at room temperature. The 4 mg of Cu(OH)<sub>2</sub> was mixed with 16  $\mu$ L of Nafion solution (~5 wt%) and 200  $\mu$ L of methanol. This dispersed ink was sprayed onto a PTFE substrate with a size of 5 $\times$ 5 cm and an area loading of 1 mg cm<sup>-2</sup>.

*Characterization:* Microstructure was collected by field-emission scanning electron microscopy (FESEM, JEOL, JSM-6500F). The crystallization of materials was assessed using a Bruker D8 Advance X-ray diffraction (XRD) analyzer with Cu K $\alpha$  radiation ( $\lambda = 1.5406$  Å). X-ray absorption spectroscopy (XAS) including X-ray absorption near edge spectra (XANES) and extended X-ray absorption fine structure (EXAFS) of Cu K-edge were collected in fluorescence mode using a Lytle detector at the BL17C and BL44A beamline in NSRRC. The data were processed through Athena software from the IFEFFIT package for analyzing XANES and EXAFS. The pre-edge baseline was subtracted and the spectra was normalized to the post-edge. EXAFS analysis was conducted using a Fourier transform on  $k^2$ -weighted EXAFS oscillations to evaluate the contribution of each bond pair to the Fourier transform peak. REX2000 software using ab initio-calculated phases and amplitudes from the program FEFF 8.2 was used for EXAFS fitting. The  $k$ -range and  $R$ -range for the  $k^2$ -weighted Fe K-edge EXAFS are 3.5-11<sup>-1</sup> Å and 1.2-2.9 Å, respectively. Cu-Cu path was adopted for structural fitting. Fitted structural parameters from  $k^2$  weighted EXAFS oscillations were also shown in this figure. N: coordination number; R: interatomic distance;  $\sigma^2$ : the EXAFS Debye–Waller factor. Wavelet analyses were performed in Matlab R2020.

*Electrochemical measurement:* Electrochemical properties were investigated using a Biologic VSP-3e potentiostat in a flow cell reactor using a gas diffusion electrode (GDE) as the working electrode (WE), nickel foam as the counter electrode (CE), and a saturated Ag/AgCl electrode as the reference electrode (RE). The WE and CE were separated by an anion exchange membrane. An aqueous solution of 1.0 M KOH was used as the electrolyte, and the flow rate of CO<sub>2</sub> was 50 sccm. The working area of electrodes was 1.0 cm<sup>2</sup> for each experiment. The

gaseous products were evaluated via gas chromatography (Agilent 8860) equipped with a thermal conductivity detector and a flame ionization detector.

*Operando XAS measurement:* *Operando XAS* was carried out in the same conditions as electrochemical testing using the designed flow cell with an opening sealed by Kapton tape in the gas chamber. X-ray was allowed to transmit through the tape and electrolyte, so that the signal of X-ray absorption spectroscopy would be collected in total-fluorescence-yield mode at the BL17C and BL44A beamline.

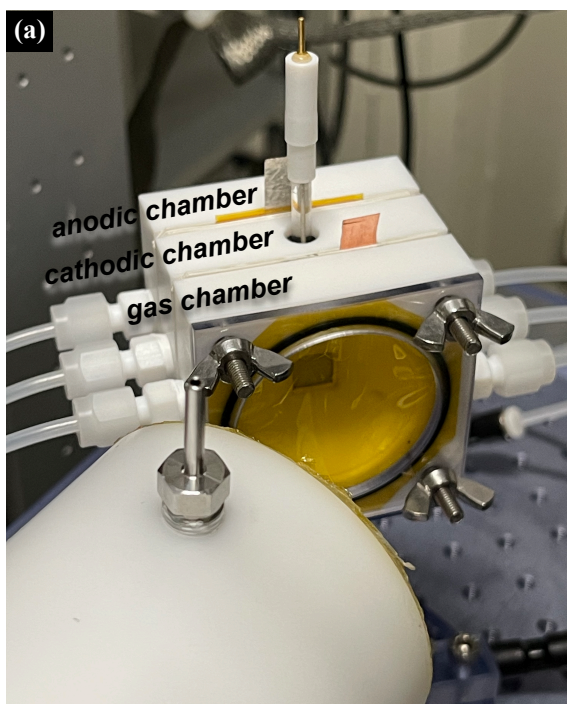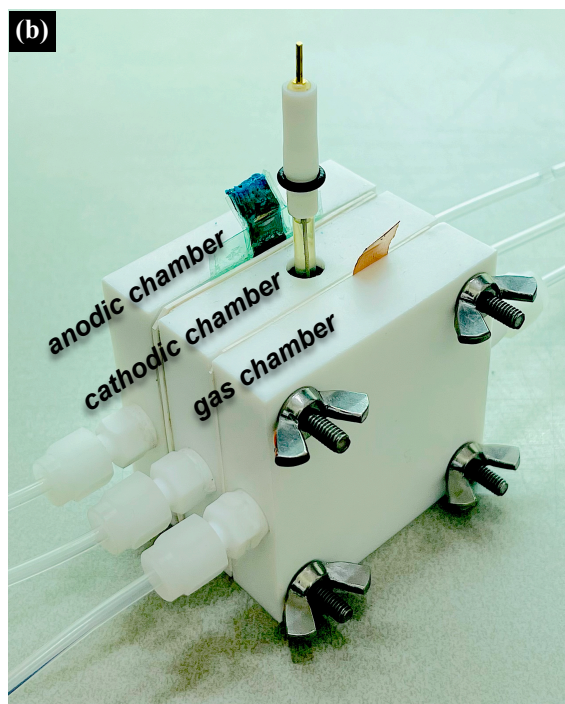

**Figure S1.** Comparison of the flow cell for (a) the *operando* X-ray absorption spectroscopy and (b) the typical electrochemical measurement.

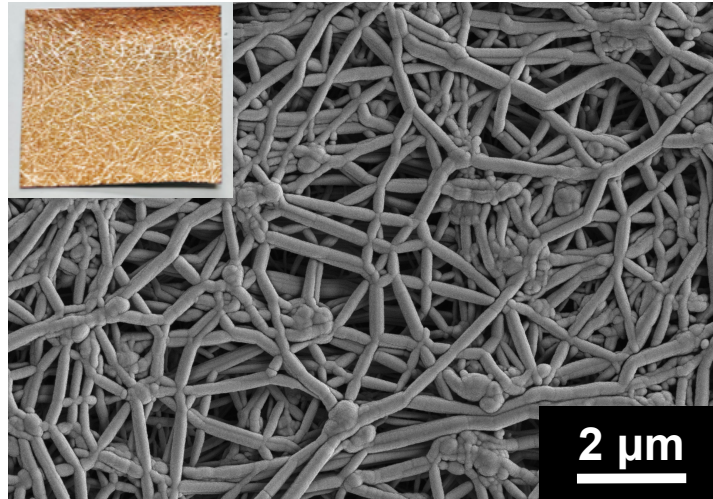

**Figure S2.** Microstructure of a sputtered Cu on the PTFE substrate. The inset figure shows the digital photograph of the gas diffusion electrode.

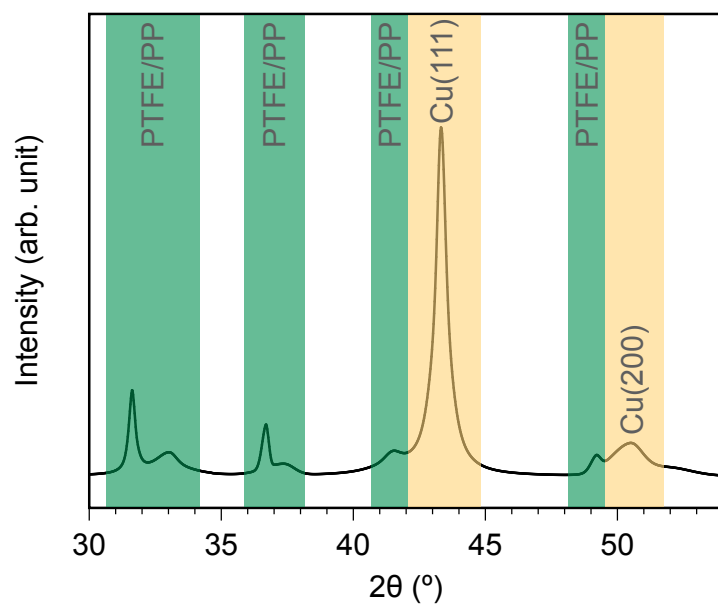

**Figure S3.** XRD pattern of a sputtered Cu on the PTFE substrate.

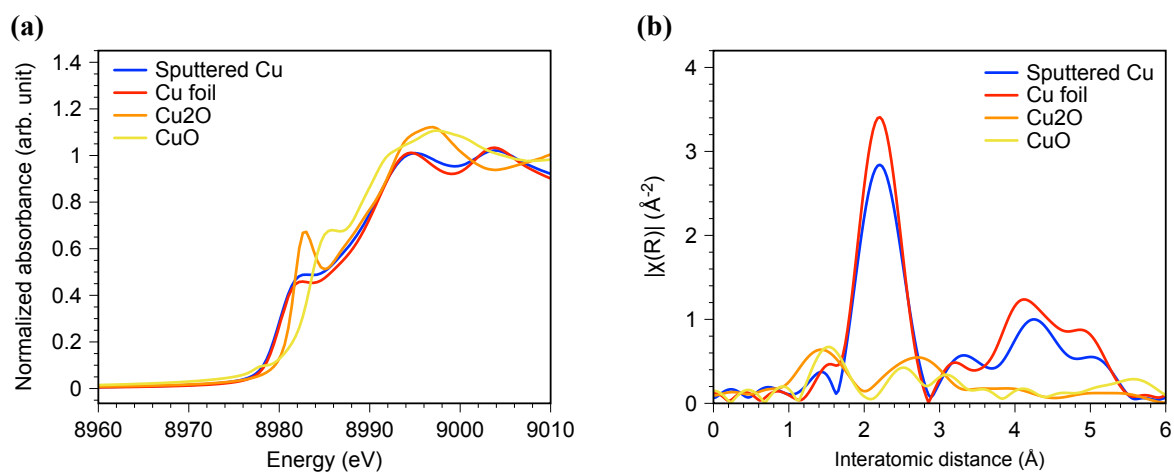

**Figure S4.** (a) Cu K-edge XANES spectra of a sputtered Cu on the PTFE substrate. The standard of Cu foil, Cu<sub>2</sub>O, and CuO showed the edge position of Cu<sup>0</sup>, Cu<sup>+</sup>, and Cu<sup>2+</sup>. (b) Cu K-edge EXAFS spectra of a sputtered Cu on the PTFE substrate.

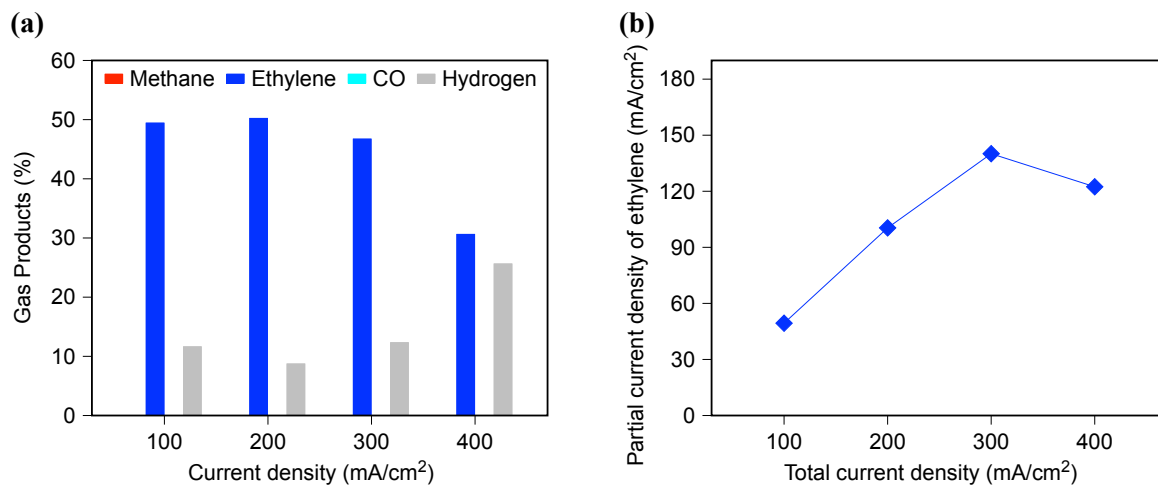

**Figure S5.** (a) Faradaic efficiency and (b) partial current to ethylene of a sputtered Cu on the PTFE substrate at various currents for CO<sub>2</sub>RR.



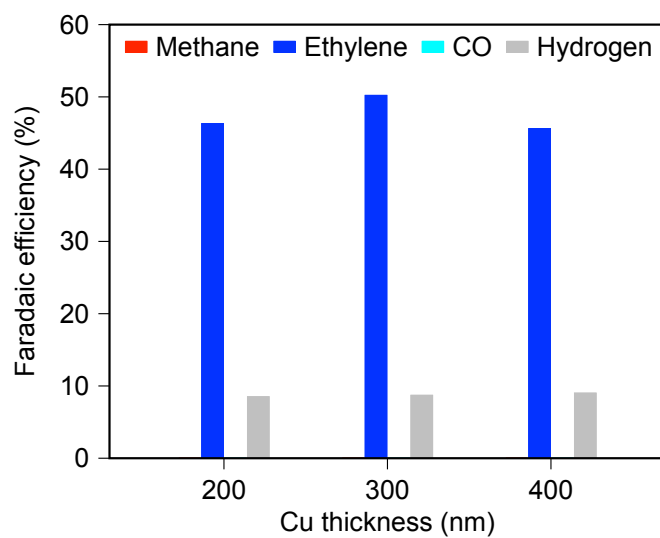

**Figure S6.** (a) Faradaic efficiency and (b) partial current to ethylene of the sputtered Cu on the PTFE substrate with different thicknesses for CO<sub>2</sub>RR. It shows that the optimized thickness of the sputter Cu is 300 nm for ethylene production.

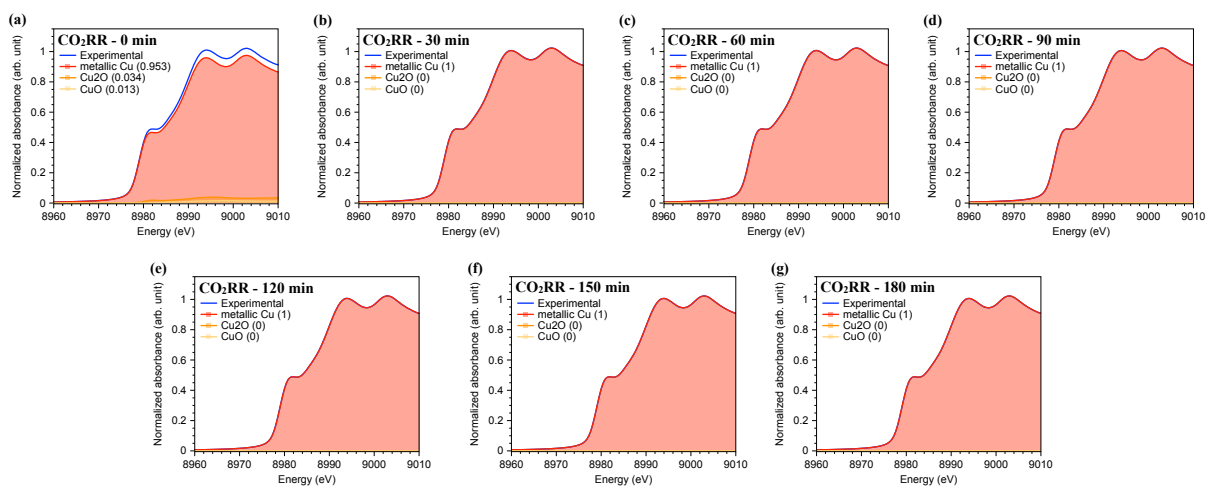

**Figure S7.** Linear combination fitting of the operando spectra for a sputtered Cu on the PTFE substrate at (a) 0 min, (b) 30 min, (c) 60 min, (d) 90 min, (e) 120 min, (f) 150 min, and (g) 180 min during CO<sub>2</sub>RR.

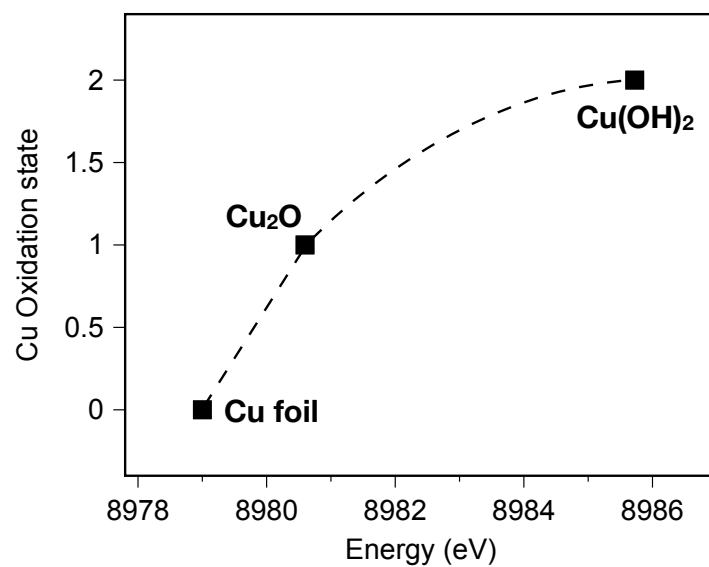

**Figure S8.** Correlation between the Cu oxidation state and the energy position of standard samples (Cu foil, Cu<sub>2</sub>O, and Cu(OH)<sub>2</sub>) obtained by zero point of the second derivatives of the XANES spectra.

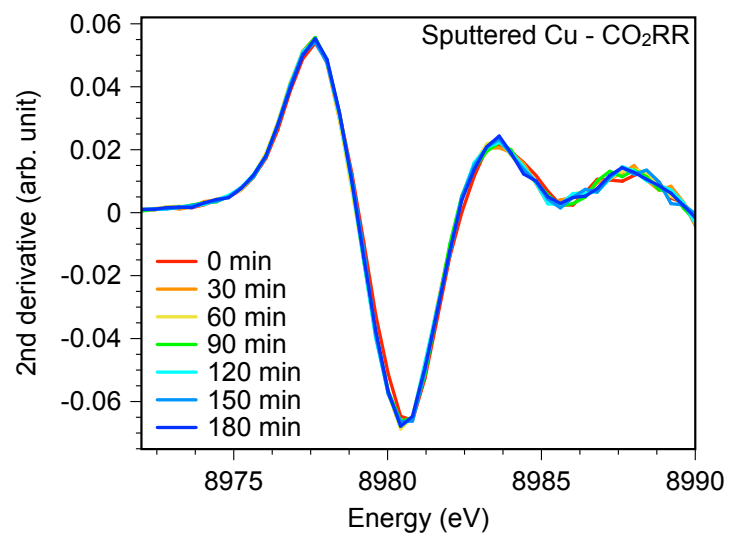

**Figure S9.** Second derivatives of the operando XANES spectra for the sputtered Cu during CO<sub>2</sub>RR.

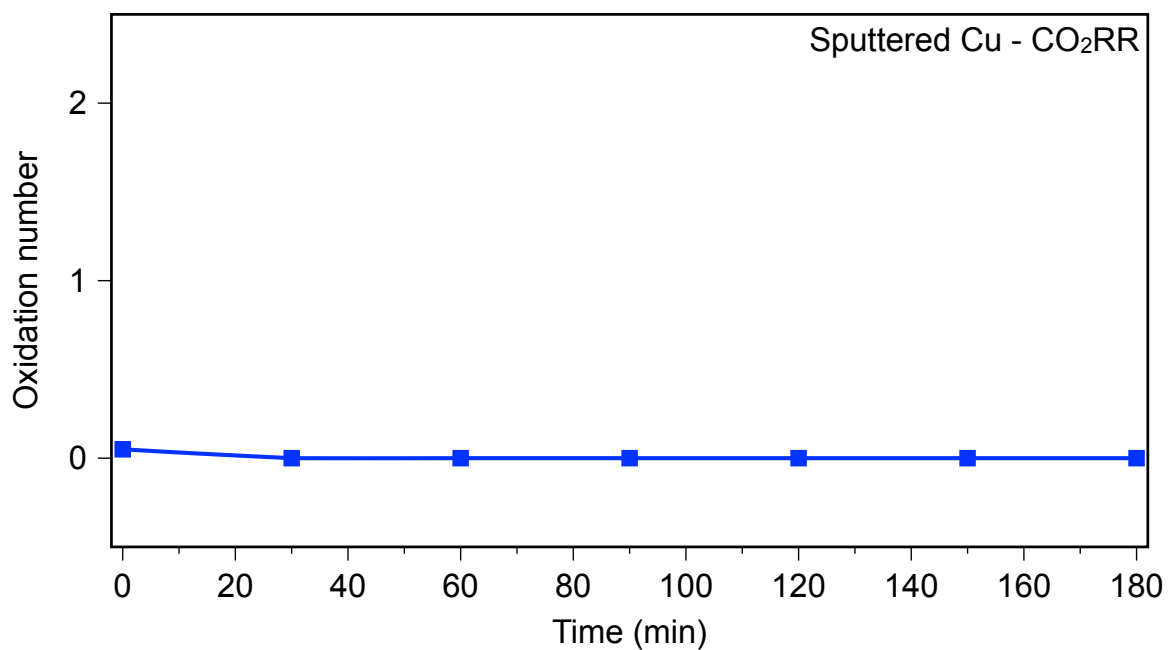

**Figure S10.** Investigation of Cu oxidation state for the sputtered Cu during CO<sub>2</sub>RR. Initially, the oxidation number of the sputtered Cu was nearly zero. During the reaction, the sputtered Cu stayed in the pure metallic state.

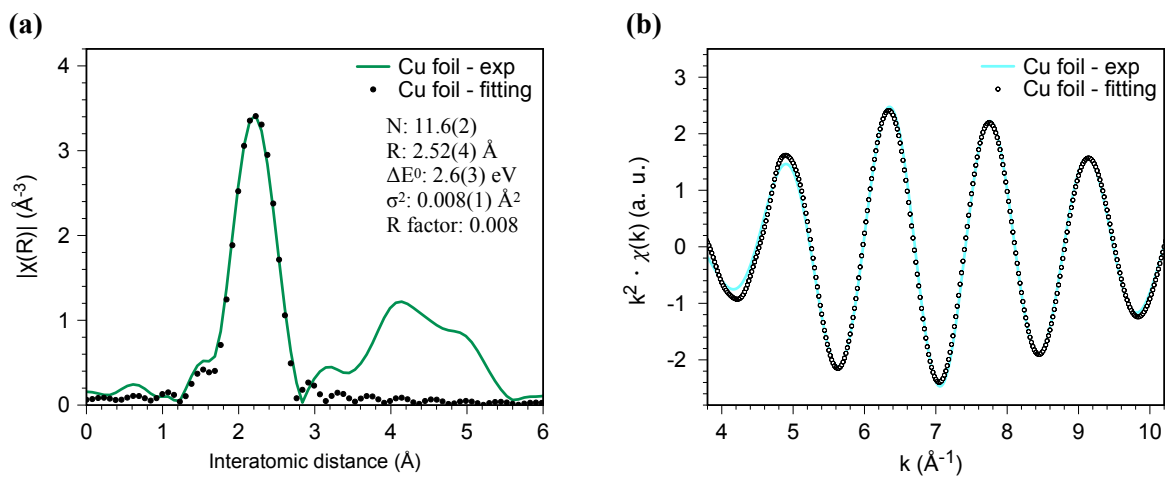

**Figure S11.** EXAFS fitting results of a metallic Cu foil in R and k space. The coordination number of the Cu foil is close to 12, which is the ideal coordination number for the metallic Cu.

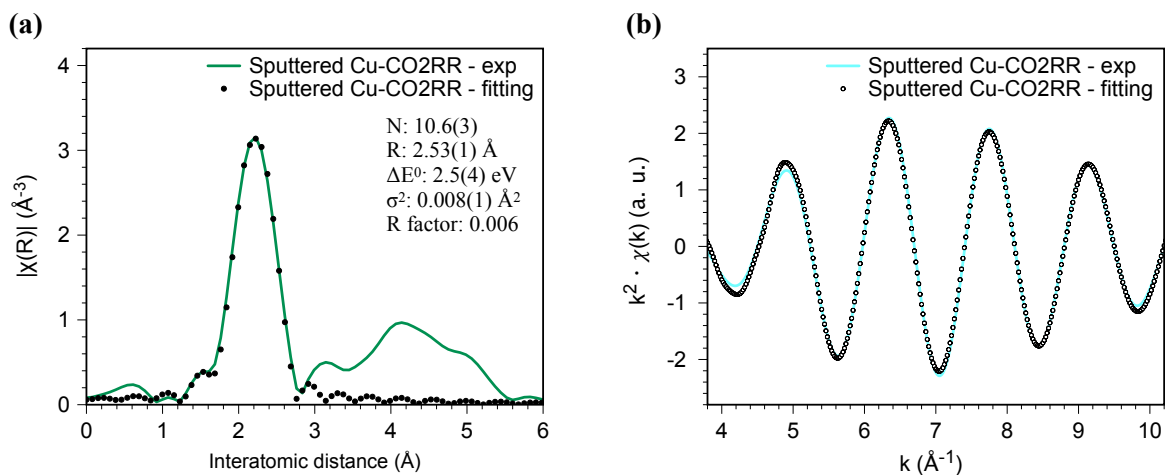

**Figure S12.** EXAFS fitting results of the sputtered Cu at the continuous operation of 180 minutes in R and k space. The coordination number of the sputtered Cu is lower than the Cu foil. It indicates that the grain size of the sputtered Cu is still smaller than the Cu foil.

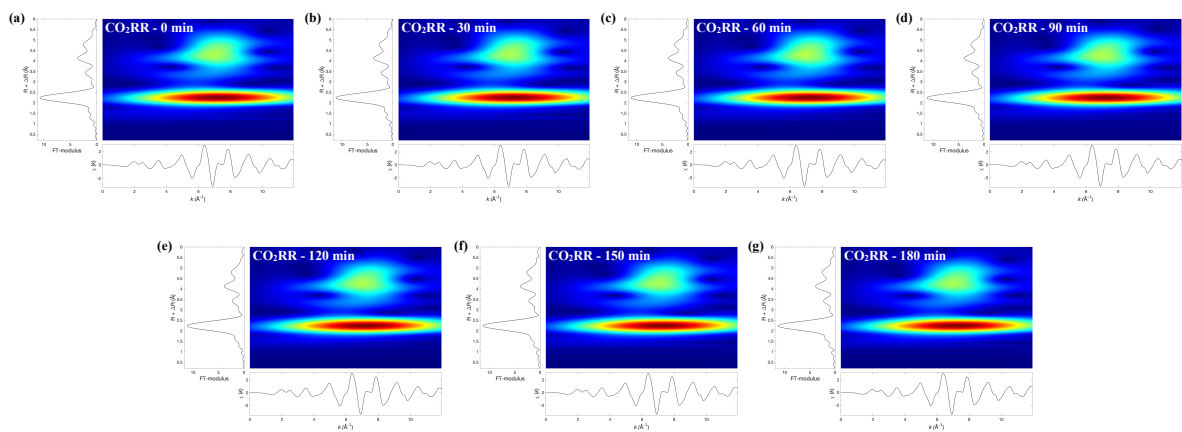

**Figure S13.** Wavelet analysis of the operando spectra for a sputtered Cu on the PTFE substrate at (a) 0 min, (b) 30 min, (c) 60 min, (d) 90 min, (e) 120 min, (f) 150 min, and (g) 180 min during CO<sub>2</sub>RR.



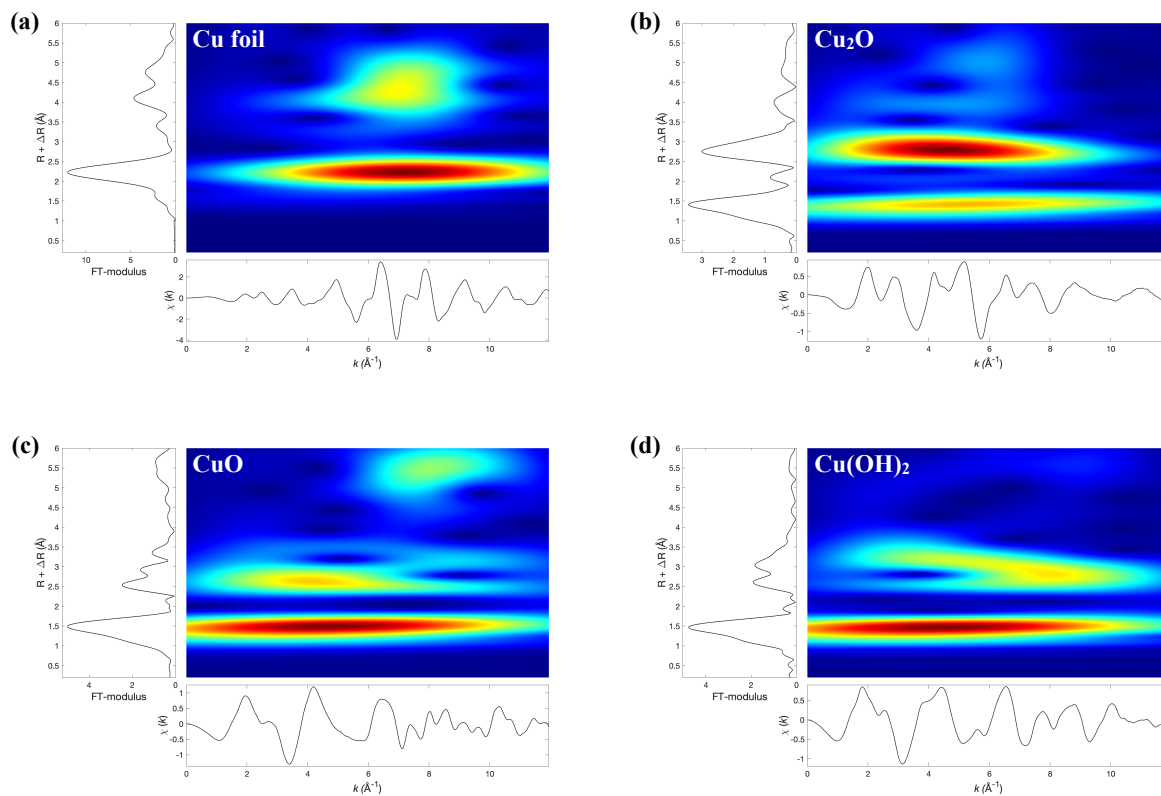

**Figure S14.** Wavelet analysis of standard samples (Cu foil,  $\text{Cu}_2\text{O}$ , and  $\text{Cu}(\text{OH})_2$ ).

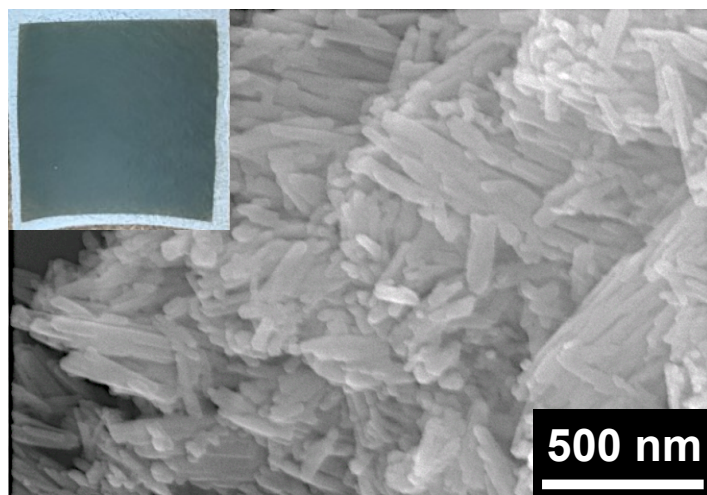

**Figure S15.** Microstructure of the synthesized Cu(OH)<sub>2</sub>. The inset figure shows the digital photograph of the gas diffusion electrode.

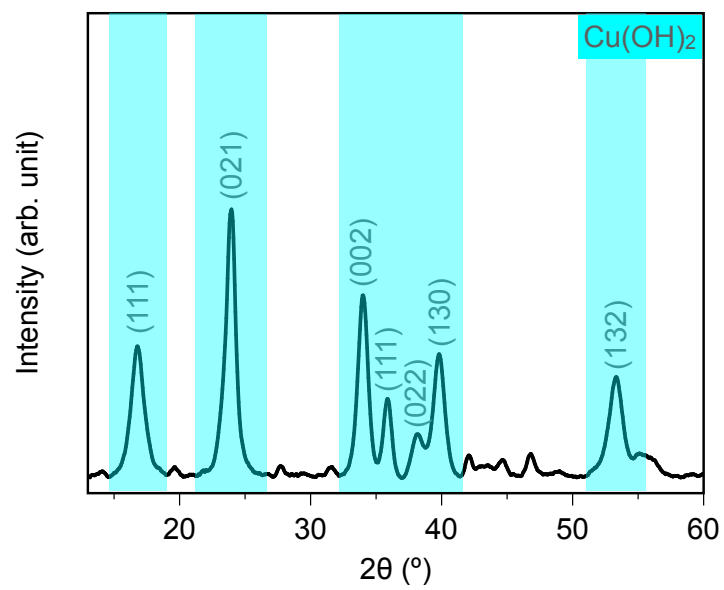

**Figure S16.** XRD pattern of the synthesized  $\text{Cu}(\text{OH})_2$ .

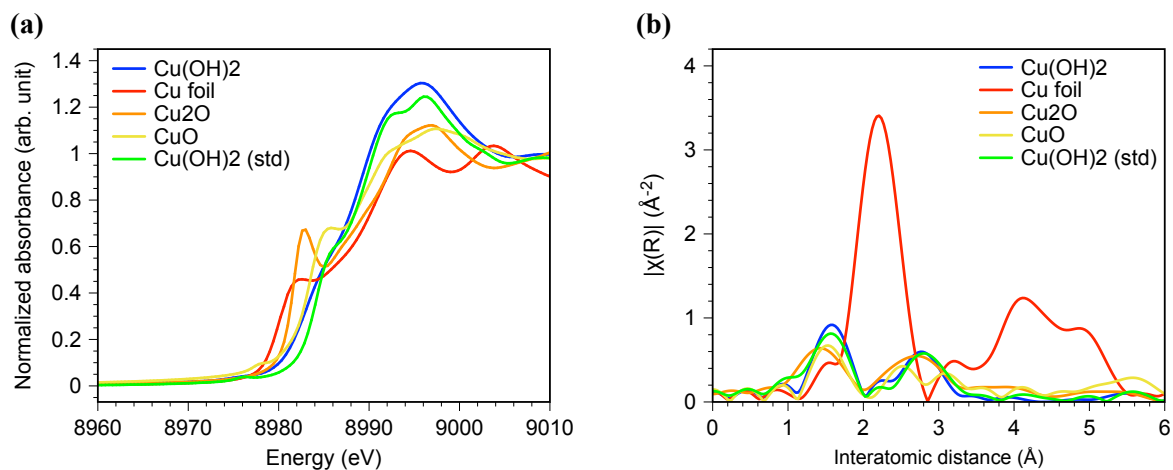

**Figure S17.** (a) Cu K-edge XANES spectra of the sprayed Cu(OH)<sub>2</sub> on the PTFE substrate. The standard of Cu foil, Cu<sub>2</sub>O, and CuO showed the edge position of Cu<sup>0</sup>, Cu<sup>+</sup>, and Cu<sup>2+</sup>. (b) Cu K-edge EXAFS spectra of a sputtered Cu on the PTFE substrate.

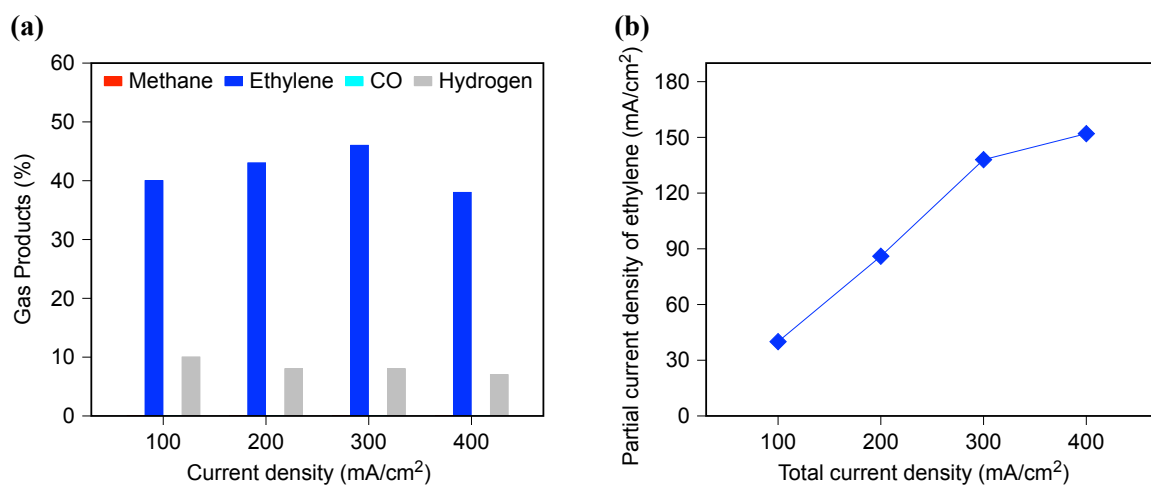

**Figure S18.** (a) Faradaic efficiency and (b) partial current to ethylene of the sprayed  $\text{Cu}(\text{OH})_2$  on the PTFE substrate at various currents for  $\text{CO}_2\text{RR}$ .

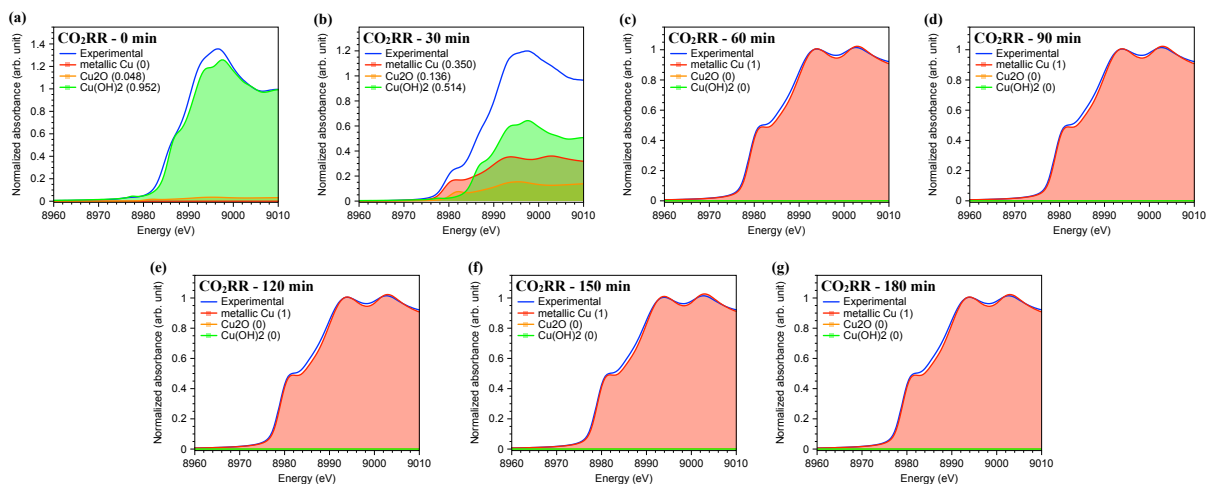

**Figure S19.** Linear combination fitting of the operando spectra for the sprayed  $\text{Cu(OH)}_2$  on the PTFE substrate at (a) 0 min, (b) 30 min, (c) 60 min, (d) 90 min, (e) 120 min, (f) 150 min, and (g) 180 min during  $\text{CO}_2\text{RR}$ .

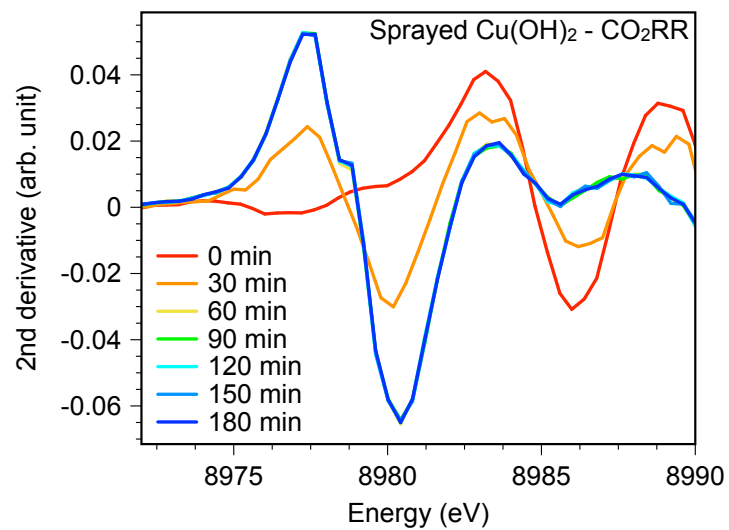

**Figure S20.** Second derivatives of the operando XANES spectra for the sprayed Cu(OH)<sub>2</sub> during CO<sub>2</sub>RR.

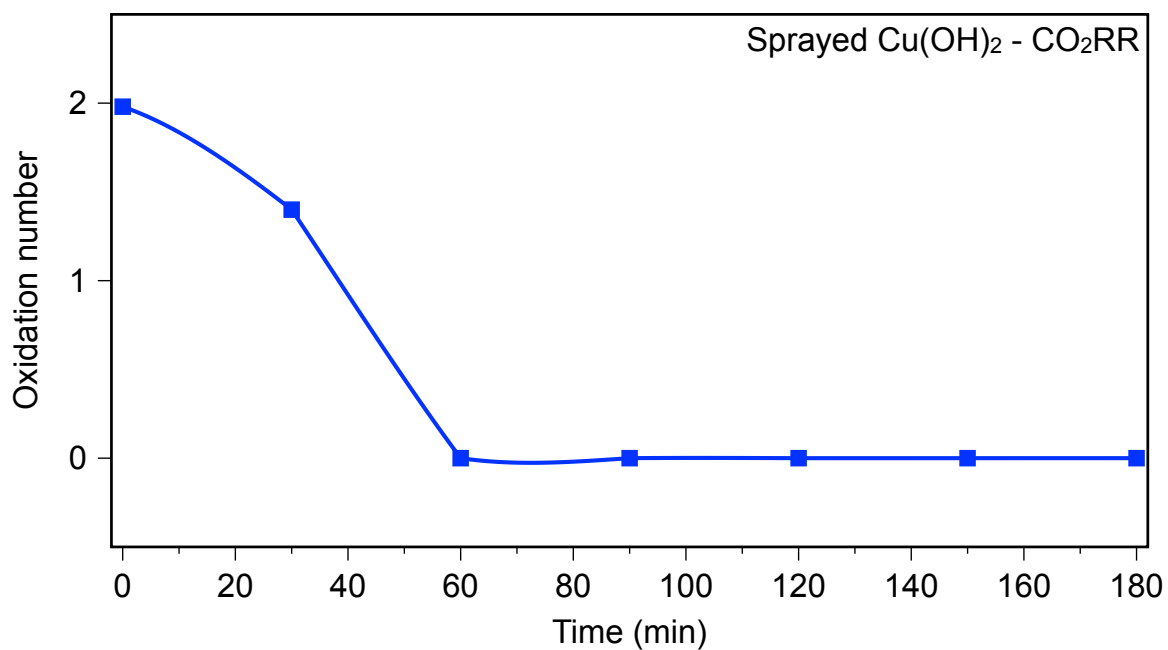

**Figure S21.** Investigation of Cu oxidation state for the sprayed Cu(OH)<sub>2</sub> during CO<sub>2</sub>RR. Initially, the oxidation number of the sprayed Cu(OH)<sub>2</sub> was nearly +2. After 30 min of continuous CO<sub>2</sub>RR, the oxidation number decreased to +1.4, corresponding to the considerable amounts of Cu(OH)<sub>2</sub> and Cu<sub>2</sub>O in the sample. Cu(OH)<sub>2</sub> converted into the pure metallic state, leading to the zero valence after one hour.



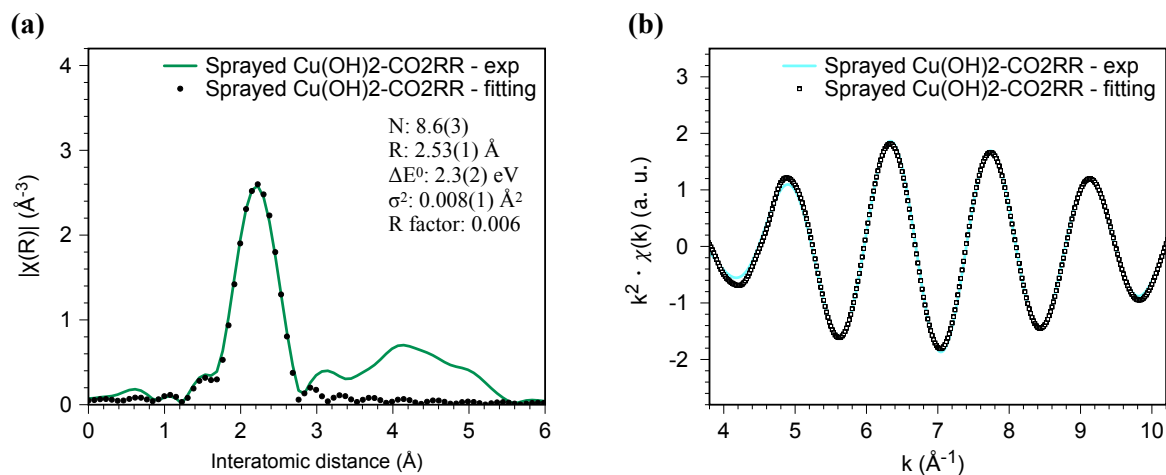

**Figure S22.** EXAFS fitting results of the sprayed  $\text{Cu}(\text{OH})_2$  at the continuous operation of 180 minutes in R and k space. The coordination number of the sprayed  $\text{Cu}(\text{OH})_2$  is significantly lower than the Cu foil and Sputtered Cu. It suggests that the aggregated size of  $\text{Cu}(\text{OH})_2$  due to the electrochemical reduction was relatively small and did not become larger with the reaction time.

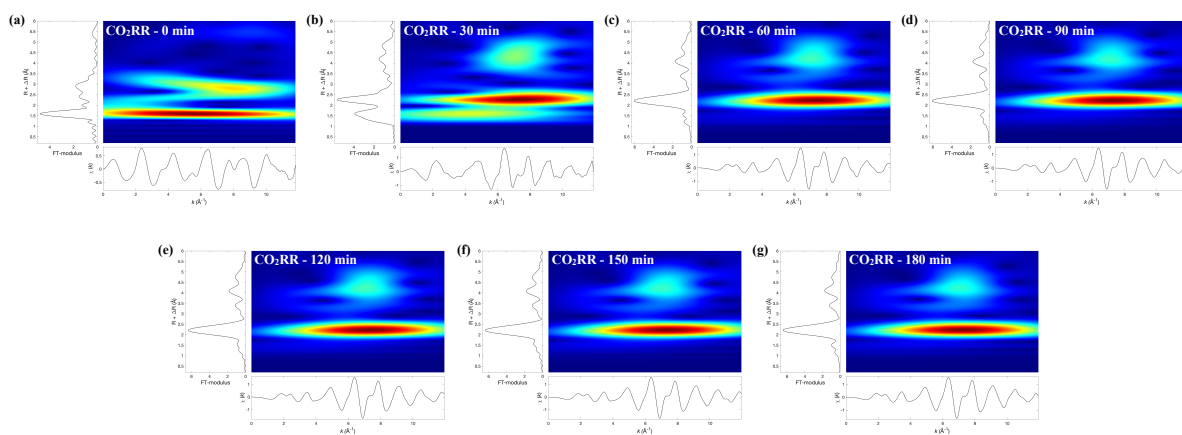

**Figure S23.** Wavelet analysis of the operando spectra for the sprayed  $\text{Cu}(\text{OH})_2$  on the PTFE substrate at (a) 0 min, (b) 30 min, (c) 60 min, (d) 90 min, (e) 120 min, (f) 150 min, and (g) 180 min during  $\text{CO}_2\text{RR}$ . The initial state matches the standard sample  $\text{Cu}(\text{OH})_2$ , shown in Figure S14. After 30 min of continuous  $\text{CO}_2\text{RR}$ , the signal mainly comes from  $\text{Cu}(\text{OH})_2$  and metallic Cu, while the signal of  $\text{Cu}_2\text{O}$  is too faint to be observed. Metallic Cu dominates the wavelet signal after one hour.
